# Supplementary material for: miR-204 silencing reduces mitochondrial autophagy and ROS production in a murine AD model via the TRPML1-activated STAT3 pathway
Source: PubMed Central journal article supplement — Mol Ther Nucleic Acids. 2021 Feb 15;24:822–31. doi: 10.1016/j.omtn.2021.02.010 (PMC8121631; doi:10.1016/j.omtn.2021.02.010), 2021-02-15
Supplement: mmc1.pdf [file mmc1.pdf]

**OMTN, Volume 24**

**Supplemental information**

**miR-204 silencing reduces mitochondrial  
autophagy and ROS production in a murine**

**AD model via the TRPML1-activated STAT3 pathway**

**Lu Zhang, Yu Fang, Xinyu Zhao, Yake Zheng, Yunqing Ma, Shuang Li, Zhi  
Huang, and Lihao Li**

**Table S1** Primer sequences of RT-qPCR

| Target  | Sequence                                                               |
|---------|------------------------------------------------------------------------|
| TRPML1  | F: 5'-GGAGTTTGTCAATGGCTGGT-3'<br>R: 5'-GAATGACACCGACCCAGACT-3'         |
| miR-204 | F: 5'-GGTTCCTTTGTCATCC-3'<br>R: 5'-TGCGTGTCGTGGAGTC-3'                 |
| U6      | F: 5'-GCTTCGGCAGCACATATACTAAAAT-3'<br>R: 5'-CGCTTCACGAATTTGCGTGTCAT-3' |
| GAPDH   | F: 5'-GCTTCGGCAGCACATATACTAAAAT-3'<br>R: 5'-AGATGATGACCCTTTTGGCTC-3'   |

RT-qPCR: reverse transcription quantitative polymerase chain reaction; TRPML1: transient receptor potential mucolipin-1; miR: microRNA; GAPDH: glyceraldehyde-3-phosphate dehydrogenase; F: forward; R: reverse.

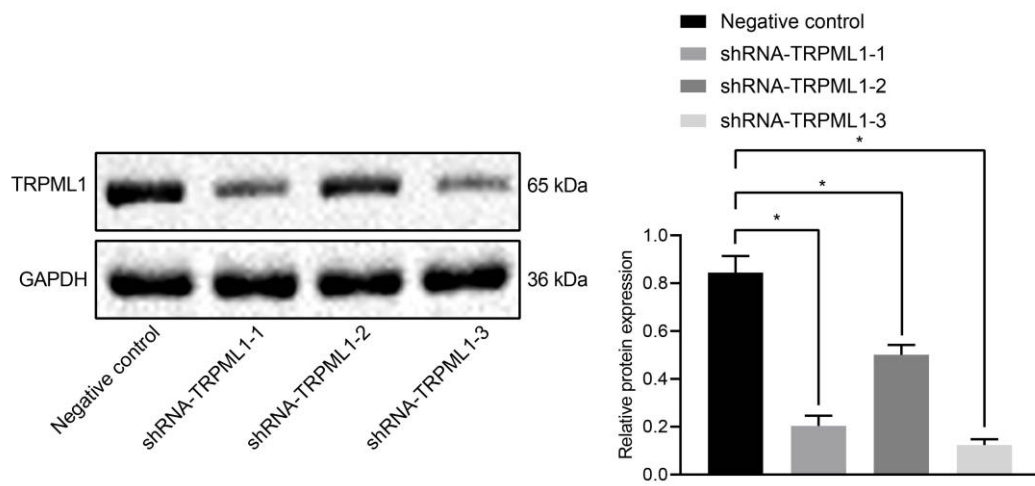

**Fig. S1** The off-target efficacy of shRNAs against TRPML1 (sh-TRPML1-1, sh-TRPML1-2, sh-TRPML1-3)

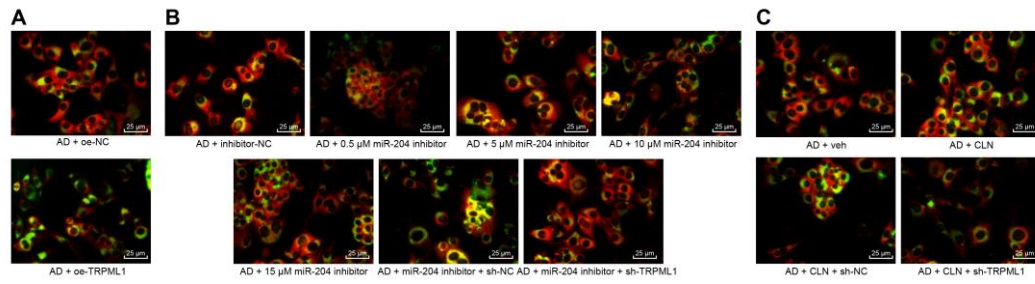

**Fig. S2** Co-localization of mitochondria and lysosomes after different treatment detected by Mitotracker (green) and Lysotracker (red) staining. A: co-localization of mitochondria and lysosomes after TRPML1 overexpression treatment. B: co-localization of mitochondria and lysosomes after miR-204 inhibitor (0.5  $\mu$ M, 5  $\mu$ M, 10  $\mu$ M, and 15  $\mu$ M) and sh-TRPML1 treatment. C: co-localization of mitochondria and lysosomes after CLN and sh-TRPML1 treatment. The yellow color indicates the merging of Mitotracker and Lysotracker.

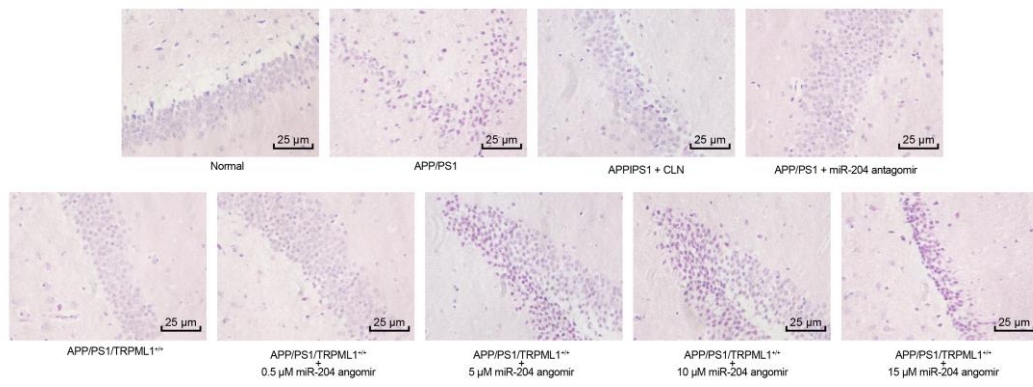

**Fig. S3** HE staining was used to detect the pathological changes of hippocampus in mice.
